# Supplementary material
Source: publisher figshare collection journal article supplement (https://acs.figshare.com/ndownloader/files/12909509)
Supplement: Supplementary file 1 [file 12909509]

# Supporting Information

## Evolution of Waste Iron Rust into Magnetically Separable g-C<sub>3</sub>N<sub>4</sub>-Fe<sub>2</sub>O<sub>3</sub> Photocatalyst: An Efficient and Economical Waste Management Approach

Santosh Babar<sup>†§</sup>, Nana Gavade<sup>§</sup>, Harish Shinde<sup>§</sup>, Prasad Mahajan<sup>■</sup>, Ki Hwan Lee<sup>■</sup>, Narayan Mane<sup>◇</sup>, Ashish. Deshmukh<sup>◇</sup>, Kalyanrao Garadkar<sup>\*§</sup> and Vijaykumar Bhuse<sup>\*†</sup>

<sup>†</sup>Thin Film Research Laboratory, Department of Chemistry, Government Rajaram College, Kolhapur, Maharashtra, India-416004.

<sup>§</sup>Nanomaterials Research Laboratory, Department of Chemistry, Shivaji University, Kolhapur, Maharashtra, India-416004.

<sup>■</sup>Department of Chemistry, Kongju National University, Gongju, Chungnam 32588, Republic of Korea.

<sup>◇</sup>Cellular Stress Response Laboratory, Cell Biology Division, Department of Zoology, Shivaji University, Kolhapur, Kolhapur, Maharashtra, India-416004.

**\* Corresponding Author. Tel.:** +91 0231 2609167; Fax: +91 0231 2692333.

**Email:** kmg\_chem@unishivaji.ac.in (K. M. Garadkar),  
vijaykbhuse13@gmail.com (V. M. Bhuse)

### Supporting Figures:

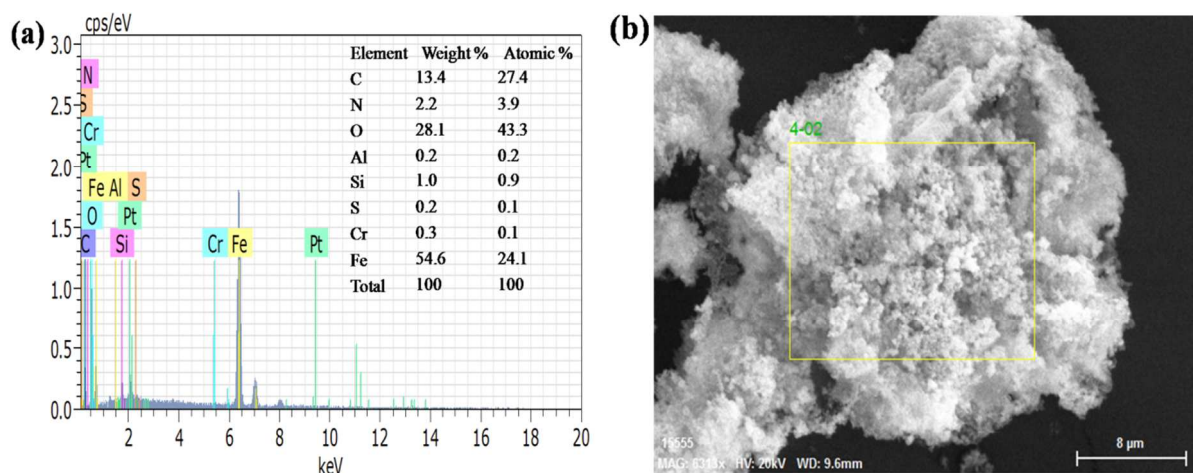

**Figure S1:** EDS spectrum (a) and SEM image (b) of as-obtained iron rust.

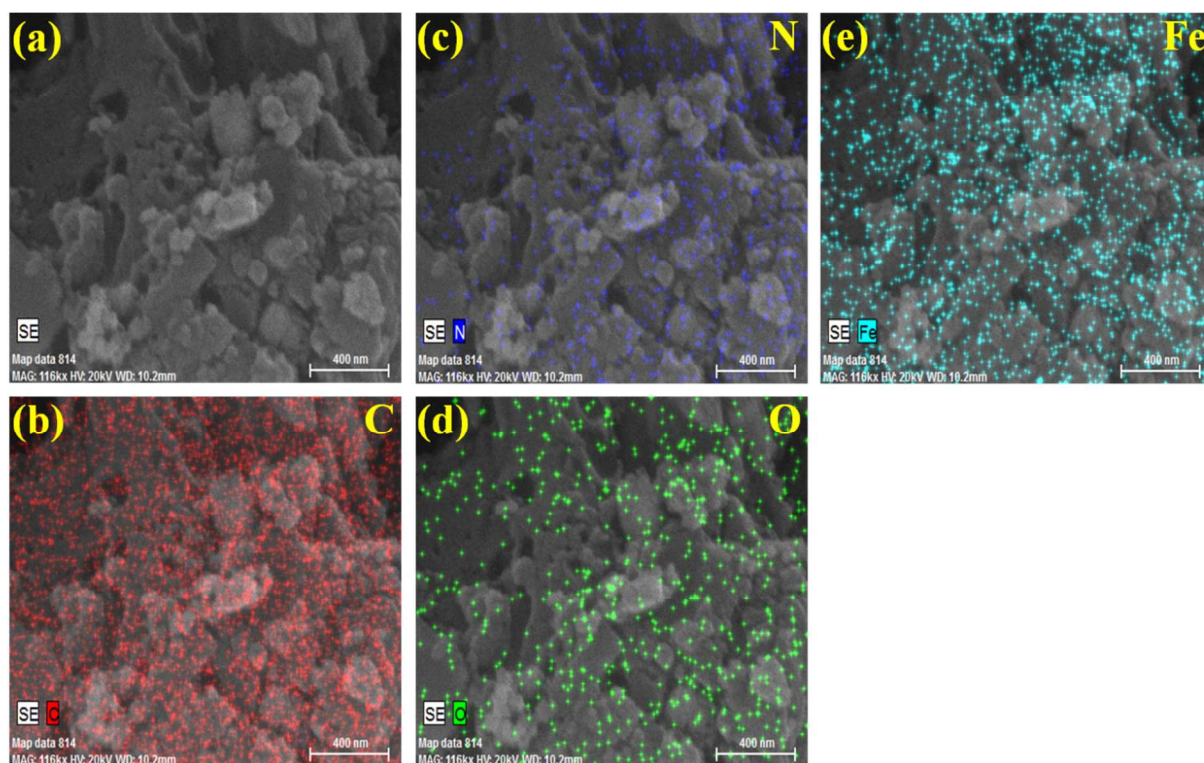

**Figure S2:** (a) SEM and corresponding elemental mappings images of  $C_3N_4-Fe_2O_3$ : (b) C element, (c) N element, (d) O element, (e) Fe element

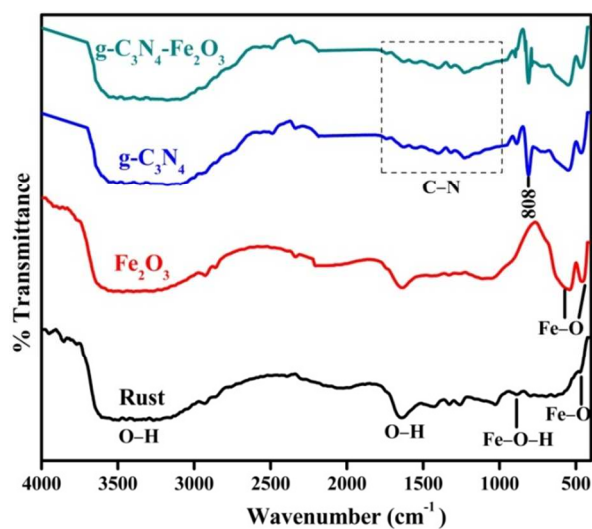

**Figure S3:** FT-IR spectra of Rust,  $Fe_2O_3$ ,  $g-C_3N_4$ , and  $g-C_3N_4-Fe_2O_3$

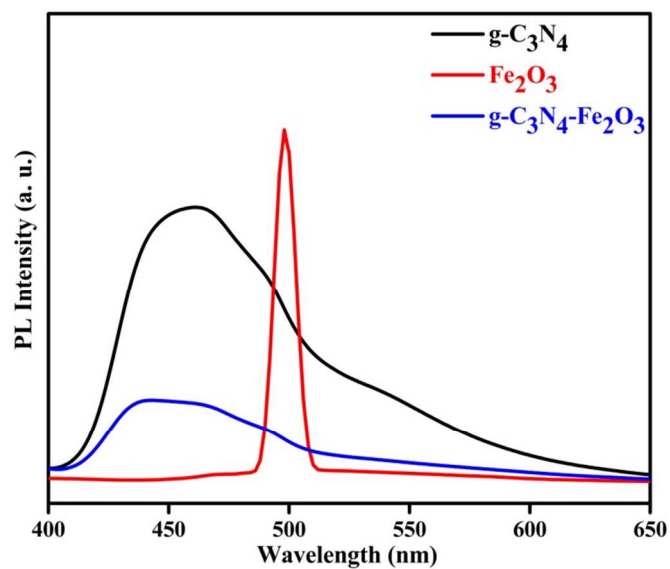

**Figure S4:** Photoluminescence (PL) spectra of Fe<sub>2</sub>O<sub>3</sub>, g-C<sub>3</sub>N<sub>4</sub>, and g-C<sub>3</sub>N<sub>4</sub>-Fe<sub>2</sub>O<sub>3</sub>.

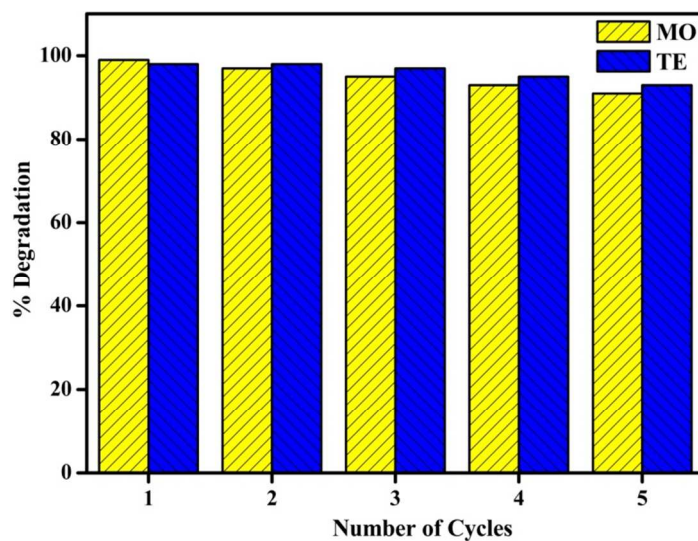

**Figure S5:** Reusability of the g-C<sub>3</sub>N<sub>4</sub>-Fe<sub>2</sub>O<sub>3</sub> for MO and TE degradation under sunlight irradiation.

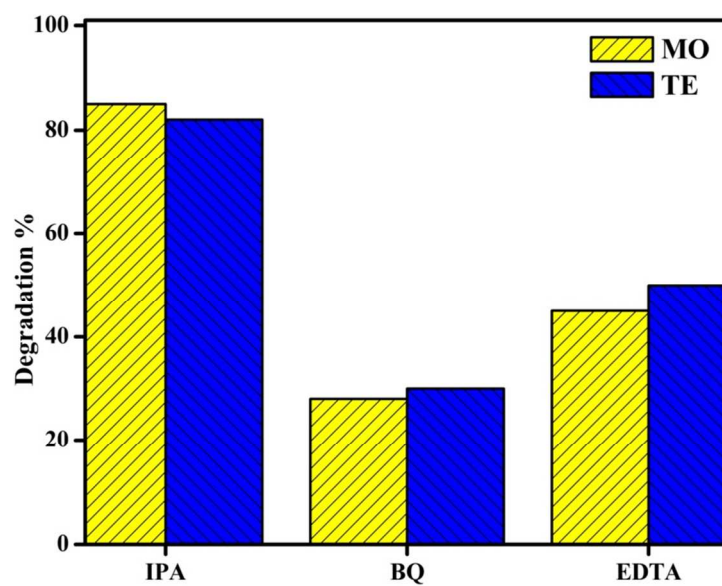

**Figure S6:** Effects of different scavengers on the photodegradation of MO and TE in the presence of the g-C<sub>3</sub>N<sub>4</sub>-Fe<sub>2</sub>O<sub>3</sub> under sunlight irradiation.
